# Supplementary material
Source: MDPI journal article supplement (https://www.mdpi.com/2571-9408/4/4/158)
Supplement: s1 [file s1]

|        | Site                           | N. | Sample | Base glass     | Colourant                   | Opacifier          |
|--------|--------------------------------|----|--------|----------------|-----------------------------|--------------------|
| Red    | Khirbat al-Mafjar (KH)         | 1  | R1     | Egypt I        | Cu nano-particles           | Cu nano-particles  |
|        | Great Mosque of Damascus (DMS) | 0  |        |                |                             |                    |
|        | Dome of the Rock (DR)          | 2  | R1     | Apollonia-type | Cu nano-particles           | Cu nano-particles  |
|        |                                |    | R2     | Foy-2          | Cu nano-particles           | Cu nano-particles  |
| Yellow | Khirbat al-Mafjar (KH)         | 2  | G2     | Apollonia-type | Lead Tin Yellow II          | Lead Tin Yellow II |
|        |                                |    | G/V3   | Egypt I        | Lead Tin Yellow II          | Lead Tin Yellow II |
|        | Great Mosque of Damascus (DMS) | 5  | 2Ba    | Apollonia-type | Lead Tin Yellow II          | Lead Tin Yellow II |
|        |                                |    | 2Bb    | Egypt I        | Lead Tin Yellow II          | Lead Tin Yellow II |
|        |                                |    | 7G     | Foy-2          | Lead Tin Yellow II          | Lead Tin Yellow II |
|        |                                |    | 9I     | Apollonia-type | Lead Tin Yellow II          | Lead Tin Yellow II |
|        |                                |    | 14O    | Apollonia-type | Iron (?)                    | Ca-Si-based        |
|        | Dome of the Rock (DR)          | 2  | GY1    | Foy-2          | Lead Tin Yellow II          | Lead Tin Yellow II |
|        |                                |    | GY2    | Egypt I        | Lead Tin Yellow II          | Lead Tin Yellow II |
| Green  | Khirbat al-Mafjar (KH)         | 6  | Vsr4   | Egypt I        | Lead Tin Yellow II + copper | Lead Tin Yellow II |
|        |                                |    | V5     | Egypt I        | Lead Tin Yellow II + copper | Lead Tin Yellow II |
|        |                                |    | A6     | Egypt I        | Copper                      | Calcium Phosphate  |
|        |                                |    | Vc8    | Egypt I        | Lead Tin Yellow II + copper | Lead Tin Yellow II |
|        |                                |    | Vc9    | Egypt I        | Lead Tin Yellow II + copper | Lead Tin Yellow II |
|        |                                |    | Ga10   | Egypt I        | Iron (?)                    | Calcium Phosphate  |
|        | Great Mosque of Damascus (DMS) | 10 | 1Aa    | Egypt I        | Lead Tin Yellow II + copper | Lead Tin Yellow II |
|        |                                |    | 1Ab    | Egypt I        | Lead Tin Yellow II + copper | Lead Tin Yellow II |
|        |                                |    | 3C     | Apollonia-type | Lead Tin Yellow II + copper | Lead Tin Yellow II |
|        |                                |    | 5Ea    | Apollonia-type | Copper                      | Calcium Phosphate  |
|        |                                |    | 5Eb    | Apollonia-type | Copper                      | Cassiterite        |
|        |                                |    | 11M    | Apollonia-type | Lead Antimonate + copper    | Lead Antimonate    |
|        |                                |    | 13Nv   | Apollonia-type | Iron                        | Ca-Si-based        |
|        |                                |    | 16Qa   | Apollonia-type | Copper                      | Calcium Phosphate  |
|        |                                |    | 17R    | Egypt I        | Copper                      | Cassiterite        |
|        |                                |    | 20U    | Egypt I        | Copper                      | Cassiterite        |
|        | Dome of the Rock (DR)          | 8  | A1     | Apollonia-type | Copper                      | Cassiterite        |
|        |                                |    | G2     | Egypt I        | Lead Tin Yellow II + copper | Lead Tin Yellow II |
|        |                                |    | G3     | Egypt I        | Lead Tin Yellow II + copper | Lead Tin Yellow II |
|        |                                |    | G4     | Egypt I        | Lead Tin Yellow II + copper | Lead Tin Yellow II |
|        |                                |    | G5     | Egypt I        | Lead Tin Yellow II + copper | Lead Tin Yellow II |
|        |                                |    | G6     | Egypt I        | Lead Tin Yellow II + copper | Lead Tin Yellow II |
|        |                                |    | G7     | Egypt I        | Lead Tin Yellow II + copper | Lead Tin Yellow II |
|        |                                |    | GR1    | Egypt I        | CuO                         | Calcium Phosphate  |
| Blue   | Khirbat al-Mafjar (KH)         | 2  | A7     | Apollonia-type | Copper                      | Calcium Phosphate  |
|        |                                |    | A7bis  | Apollonia-type | Copper                      | Calcium Phosphate  |
|        | Great Mosque of Damascus (DMS) | 1  | 10L    | Egypt I        | Copper                      | Cassiterite        |
|        | Dome of the Rock (DR)          | 6  | B1     | Foy-2          | Copper                      | Cassiterite        |
|        |                                |    | LB1    | Egypt I        | Copper                      | Calcium Phosphate  |
|        |                                |    | T1     | Foy-2          | Copper                      | Calcium Phosphate  |
|        |                                |    | T2     | Apollonia-type | Copper                      | Calcium Phosphate  |
|        |                                |    | T3     | Apollonia-type | Copper                      | Calcium Phosphate  |
|        |                                |    | T4     | Apollonia-type | Copper                      | Calcium Phosphate  |
| Black  | Khirbat al-Mafjar (KH)         | 0  |        |                |                             |                    |
|        | Great Mosque of Damascus (DMS) | 1  | 13Ngr  | Foy-2          | Cu nano-particles           | Cu nano-particles  |
|        | Dome of the Rock (DR)          | 5  | BK1    | Outlier        | Cu nano-particles           | Cu nano-particles  |
|        |                                |    | BK2    | Apollonia-type | Cu nano-particles           | Cu nano-particles  |
|        |                                |    | BK3    | Egypt I        | Cu nano-particles           | Cu nano-particles  |
|        |                                |    | BK4    | Egypt I        | Cu nano-particles           | Cu nano-particles  |
|        |                                |    | BK5    | Egypt I        | Cu nano-particles           | Cu nano-particles  |

Table S5a: Summary of data on base glass, colourants and opacifiers acquired on all opaque coloured tesserae from this study.

|             | Site                           | N. | Sample  | Base glass         | Colourant/Decolourant |
|-------------|--------------------------------|----|---------|--------------------|-----------------------|
| Yellow      | Khirbat al-Mafjar (KH)         | 4  | Am/Au11 | Beth Eli'ezer-type | Manganese             |
|             |                                |    | Am12    | Outlier            | Iron                  |
|             |                                |    | G/V13   | Apollonia-type     | Iron                  |
|             |                                |    | Am14    | Apollonia-type     | Manganese             |
|             | Great Mosque of Damascus (DMS) | 3  | 6Fs     | Apollonia-type     | Manganese             |
|             |                                |    | 18S     | Foy-2              | Manganese             |
|             |                                |    | 19T     | Apollonia-type     | Manganese             |
|             | Dome of the Rock (DR)          | 7  | Am1_Au  | Foy-2              | Manganese             |
|             |                                |    | Am2_Au  | Foy-2              | Manganese             |
|             |                                |    | Am3_Au  | Foy-2              | Manganese             |
|             |                                |    | Am4_Ag  | Foy-2              | Manganese             |
|             |                                |    | Am5_Ag  | Foy-2              | Manganese             |
| Am6_Au      |                                |    |         | Manganese          |                       |
| Y1_Au       |                                |    | Foy-2   | Manganese          |                       |
|             |                                |    |         |                    |                       |
| Green       | Khirbat al-Mafjar (KH)         | 0  |         |                    |                       |
|             | Great Mosque of Damascus (DMS) | 1  | 8H      | Apollonia-type     | Copper                |
|             | Dome of the Rock (DR)          | 1  | G1_Au   | Outlier            | Copper                |
|             |                                |    |         |                    |                       |
| Blue        | Khirbat al-Mafjar (KH)         | 1  | A15     | Outlier            | Iron                  |
|             | Great Mosque of Damascus (DMS) | 1  | 4D      | Foy-2              | Cobalt                |
|             | Dome of the Rock (DR)          |    |         |                    |                       |
|             |                                |    |         |                    |                       |
| Transparent | Khirbat al-Mafjar (KH)         | 0  |         |                    |                       |
|             | Great Mosque of Damascus (DMS) | 2  | 6Fc     | Apollonia-type     | Mn-decoloured         |
|             |                                |    | 15P     | Foy-2              | Mn-decoloured         |
|             | Dome of the Rock (DR)          |    |         |                    |                       |

Table S5b: Summary of data on base glass and colourants/decolourants acquired on all translucent and transparent tesserae from this study.
