# Supplementary material
Source: MDPI journal article supplement (https://www.mdpi.com/2571-9408/4/4/158)
Supplement: s1 [file s1]

| Tessera                                                                                           | Colour                                    |        |       | Tessera                                                                                         | Colour                                    |        |       |
|---------------------------------------------------------------------------------------------------|-------------------------------------------|--------|-------|-------------------------------------------------------------------------------------------------|-------------------------------------------|--------|-------|
| 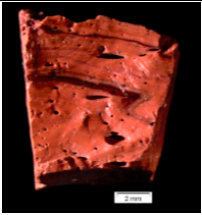<br>KH_R1        | Red (opaque)<br>[NCS S 5040-Y80R]         |        |       | <br>KH_A6      | Green (opaque)<br>[NCS S 5040-B80G]       |        |       |
|                                                                                                   | L*                                        | a*     | b*    |                                                                                                 | L*                                        | a*     | b*    |
|                                                                                                   | 34.21                                     | 23.81  | 14.39 |                                                                                                 | 31.69                                     | -12.45 | -1.59 |
| <br>KH_G2        | Yellow (opaque)<br>[NCS S 2040-G90Y]      |        |       | <br>KH_A7      | Blue (opaque)<br>[NCS S 4040-B20G]        |        |       |
|                                                                                                   | L*                                        | a*     | b*    |                                                                                                 | L*                                        | a*     | b*    |
|                                                                                                   | 65.79                                     | -0.81  | 44.28 |                                                                                                 |                                           |        |       |
| <br>KH_G/V3      | Yellow (opaque)<br>[NCS S 2040-G80Y]      |        |       | <br>KH_A7bis   | Blue (opaque)<br>[NCS S 4055-B40G]        |        |       |
|                                                                                                   | L*                                        | a*     | b*    |                                                                                                 | L*                                        | a*     | b*    |
|                                                                                                   | 60.98                                     | -3.95  | 43.13 |                                                                                                 | 29.86                                     | -13.33 | -4.44 |
| <br>KH_Vsr4     | Green (opaque)<br>[NCS S 5030-G30Y]       |        |       | <br>KH_Vc8   | Green (opaque)<br>[NCS S 3040-G]          |        |       |
|                                                                                                   | L*                                        | a*     | b*    |                                                                                                 | L*                                        | a*     | b*    |
|                                                                                                   | 54.13                                     | -9.99  | 17.51 |                                                                                                 | 48.46                                     | -13.16 | 13.37 |
| <br>KH_V5      | Green (opaque)<br>[NCS S 4030-G30Y]       |        |       | <br>KH_Vc9   | Green (opaque)<br>[NCS S 3065-G40Y]       |        |       |
|                                                                                                   | L*                                        | a*     | b*    |                                                                                                 | L*                                        | a*     | b*    |
|                                                                                                   | 43.93                                     | -18.27 | 17.66 |                                                                                                 | 49.86                                     | -15.42 | 17.43 |
| <br>KH_Ga10    | Green (opaque)<br>[NCS S 1510-G]          |        |       | <br>KH_G/V13 | Yellow (translucent)<br>[NCS S 6030-Y20R] |        |       |
|                                                                                                   | L*                                        | a*     | b*    |                                                                                                 | L*                                        | a*     | b*    |
|                                                                                                   |                                           |        |       |                                                                                                 |                                           |        |       |
| <br>KH_Am/Au11 | Yellow (translucent)<br>[NCS S 4050-Y10R] |        |       | <br>KH_Am14  | Yellow (translucent)<br>[NCS S 2060-Y]    |        |       |
|                                                                                                   | L*                                        | a*     | b*    |                                                                                                 | L*                                        | a*     | b*    |
|                                                                                                   |                                           |        |       |                                                                                                 |                                           |        |       |

| Tessera                                                                                         | Colour                                    |            |       | Tessera                                                                                          | Colour                                  |        |      |
|-------------------------------------------------------------------------------------------------|-------------------------------------------|------------|-------|--------------------------------------------------------------------------------------------------|-----------------------------------------|--------|------|
| 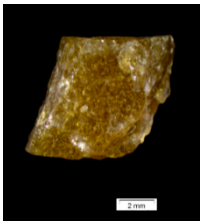<br>KH_Am12    | Yellow (translucent)<br>[NCS S 6030-Y20R] |            |       | <br>KH_A15      | Blue (translucent)<br>[NCS S 0515-B20G] |        |      |
|                                                                                                 | L*                                        | a*         | b*    |                                                                                                  | L*                                      | a*     | b*   |
|                                                                                                 |                                           |            |       |                                                                                                  |                                         |        |      |
| <br>DMS_1_Aa   | Green (opaque)<br>[NCS S 4040-G]          |            |       | <br>DMS_4_D     | Blue (translucent)<br>[NCS S 7020-R80B] |        |      |
|                                                                                                 | L*                                        | a*         | b*    |                                                                                                  | L*                                      | a*     | b*   |
|                                                                                                 | 41.16                                     | -<br>24.35 | 16.32 |                                                                                                  |                                         |        |      |
| <br>DMS_1_Ab   | Green (opaque)<br>[NCS S 4040-G]          |            |       | <br>DMS_5_Ea    | Green (opaque)<br>[NCS S 5020-B90G]     |        |      |
|                                                                                                 | L*                                        | a*         | b*    |                                                                                                  | L*                                      | a*     | b*   |
|                                                                                                 | 32.98                                     | -<br>12.91 | 6.49  |                                                                                                  | 33.01                                   | -7.56  | 0.05 |
| <br>DMS_2_Ba | Yellow (opaque)<br>[NCS S 2030-G70Y]      |            |       | <br>DMS_5_Eb  | Green (opaque)<br>[NCS S 5020-B90G]     |        |      |
|                                                                                                 | L*                                        | a*         | b*    |                                                                                                  | L*                                      | a*     | b*   |
|                                                                                                 |                                           |            |       |                                                                                                  | 40.23                                   | -17.90 | 4.68 |
| <br>DMS_2_Bb | Yellow (opaque)<br>[NCS S 2030-G70Y]      |            |       | <br>DMS_6_Fs  | Yellow (translucent)<br>[NCS S 8502-Y]  |        |      |
|                                                                                                 | L*                                        | a*         | b*    |                                                                                                  | L*                                      | a*     | b*   |
|                                                                                                 | 51.51                                     | -9.22      | 30.56 |                                                                                                  |                                         |        |      |
| <br>DMS_3_C  | Green (opaque)<br>[NCS S 3040-G20Y]       |            |       | <br>DSM_6_Fc  | Colourless<br>[...]                     |        |      |
|                                                                                                 | L*                                        | a*         | b*    |                                                                                                  | L*                                      | a*     | b*   |
|                                                                                                 | 46.10                                     | -<br>21.84 | 19.66 |                                                                                                  |                                         |        |      |
| <br>DMS_7_G  | Yellow (opaque)<br>NCS S 1020-Y]          |            |       | <br>DMS_13_Nv | Green (opaque)<br>[NCS S 8502-G]        |        |      |
|                                                                                                 | L*                                        | a*         | b*    |                                                                                                  | L*                                      | a*     | b*   |
|                                                                                                 | 70.78                                     | 1.72       | 28.34 |                                                                                                  | 25.06                                   | -0.03  | 1.95 |

| Tessera                                                                                         | Colour                                     |            |       | Tessera                                                                                          | Colour                                   |       |       |
|-------------------------------------------------------------------------------------------------|--------------------------------------------|------------|-------|--------------------------------------------------------------------------------------------------|------------------------------------------|-------|-------|
| <br>DMS_8_H    | Green (translucent)<br>[NCS S 3020-B90G]   |            |       | <br>DMS_13_Ngr  | Black (opaque)<br>[NCS S 8502]           |       |       |
|                                                                                                 | L*                                         | a*         | b*    |                                                                                                  | L*                                       | a*    | b*    |
|                                                                                                 |                                            |            |       |                                                                                                  | 21.28                                    | -0.59 | -1.22 |
| <br>DMS_9_I    | Yellow (opaque)<br>[NCS S S3020-G70Y]      |            |       | <br>DMS_14_O    | Yellow (opaque)<br>[NCS S 6020-Y10R]     |       |       |
|                                                                                                 | L*                                         | a*         | b*    |                                                                                                  | L*                                       | a*    | b*    |
|                                                                                                 | 40.23                                      | -<br>17.90 | 4.68  |                                                                                                  | 36.78                                    | 2.35  | 11.63 |
| <br>DMS_10_L   | Blue (opaque)<br>[NCS S 4050-B20G]         |            |       | <br>DMS_15_P    | Colourless<br>[...]                      |       |       |
|                                                                                                 | L*                                         | a*         | b*    |                                                                                                  | L*                                       | a*    | b*    |
|                                                                                                 |                                            |            |       |                                                                                                  |                                          |       |       |
| <br>DMS_11_M | Green/Yellow (opaque)<br>[NCS S 4020-G50Y] |            |       | <br>DMS_16-Qa | Green (opaque)<br>[NCS S 0907-B80G]      |       |       |
|                                                                                                 | L*                                         | a*         | b*    |                                                                                                  | L*                                       | a*    | b*    |
|                                                                                                 | 45.52                                      | -3.70      | 10.58 |                                                                                                  | 67.68                                    | -1.04 | 12.63 |
| <br>DMS_17_R | Green (opaque)<br>[NCS S 4550-B90G]        |            |       | <br>DMS_18_S  | Yellow (translucent)<br>[NCS S 2030-Y]   |       |       |
|                                                                                                 | L*                                         | a*         | b*    |                                                                                                  | L*                                       | a*    | b*    |
|                                                                                                 | 30.60                                      | -<br>14.56 | 3.44  |                                                                                                  |                                          |       |       |
| <br>DMS_19_T | Yellow (translucent)<br>[NCS S 3040-Y10R]  |            |       | <br>DMS_20_U  | Green/Blue (opaque)<br>[NCS S 2050-B50G] |       |       |
|                                                                                                 | L*                                         | a*         | b*    |                                                                                                  | L*                                       | a*    | b*    |
|                                                                                                 |                                            |            |       |                                                                                                  |                                          |       |       |

| Tessera                                                                                       | Colour                              |       |       | Tessera                                                                                        | Colour                              |        |       |
|-----------------------------------------------------------------------------------------------|-------------------------------------|-------|-------|------------------------------------------------------------------------------------------------|-------------------------------------|--------|-------|
| <br>DR_A1    | Green (opaque)<br>[NCS S 3040-B80G] |       |       | <br>DR_G2    | Green (opaque)<br>[NCS S 2060-G30Y] |        |       |
|                                                                                               | L*                                  | a*    | b*    |                                                                                                | L*                                  | a*     | b*    |
|                                                                                               | 43.88                               | -12.6 | -2.25 |                                                                                                | 47.65                               | -11.95 | 15.5  |
| <br>DR_B1    | Blue (opaque)<br>[NCS S 7020-R80B]  |       |       | <br>DR_G3    | Green (opaque)<br>[NCS S 3060-G20Y] |        |       |
|                                                                                               | L*                                  | a*    | b*    |                                                                                                | L*                                  | a*     | b*    |
|                                                                                               | 28.8                                | 0.34  | -7.83 |                                                                                                | 44.93                               | -22.83 | 15.34 |
| <br>DR_BK1   | Black (opaque)<br>[NCS S 9000-N]    |       |       | <br>DR_G4    | Green (opaque)<br>[NCS S 3060-G]    |        |       |
|                                                                                               | L*                                  | a*    | b*    |                                                                                                | L*                                  | a*     | b*    |
|                                                                                               | 24.15                               | 0.01  | -1.1  |                                                                                                | 40.88                               | -13.11 | 5.55  |
| <br>DR_BK2  | Black (opaque)<br>[NCS S 9000-N]    |       |       | <br>DR_G5   | Green (opaque)<br>[NCS S 2555-B80G] |        |       |
|                                                                                               | L*                                  | a*    | b*    |                                                                                                | L*                                  | a*     | b*    |
|                                                                                               | 24.7                                | 0.01  | 0.6   |                                                                                                | 32.2                                | -11.95 | 2.29  |
| <br>DR_BK3 | Black (opaque)<br>[NCS S 8550-N]    |       |       | <br>DR_G6  | Green (opaque)<br>[NCS S 4040-B90G] |        |       |
|                                                                                               | L*                                  | a*    | b*    |                                                                                                | L*                                  | a*     | b*    |
|                                                                                               | 27.6                                | -0.33 | 0.3   |                                                                                                | 44.11                               | -11.95 | 3.72  |
| <br>DR_BK4 | Black (opaque)<br>[NCS S 8500-N]    |       |       | <br>DR_G7  | Green (opaque)<br>[NCS S 2050-G20Y] |        |       |
|                                                                                               | L*                                  | a*    | b*    |                                                                                                | L*                                  | a*     | b*    |
|                                                                                               | 24.4                                | 0.97  | 0.42  |                                                                                                | 36.2                                | -4.44  | 9.75  |
| <br>DR_BK5 | Black (opaque)<br>[NCS S 9000-N]    |       |       | <br>DR_GR1 | Green (opaque)<br>[NCS S 4010-G10Y] |        |       |
|                                                                                               | L*                                  | a*    | b*    |                                                                                                | L*                                  | a*     | b*    |
|                                                                                               | 24.28                               | 0.73  | 0.38  |                                                                                                | 58.74                               | -6.32  | 2.5   |

| Tessera                                                                                      | Colour                                   |       |       | Tessera                                                                                           | Colour                                                          |        |       |
|----------------------------------------------------------------------------------------------|------------------------------------------|-------|-------|---------------------------------------------------------------------------------------------------|-----------------------------------------------------------------|--------|-------|
| <br>DR_GY1  | Yellow (opaque)<br>[NCS S 1050-G60Y]     |       |       | <br>DR_T2       | Blue (opaque)<br>[NCS S 4550-B20G]                              |        |       |
|                                                                                              | L*                                       | a*    | L*    |                                                                                                   | L*                                                              | a*     | b*    |
|                                                                                              | 56.35                                    | -7.48 | 29.22 |                                                                                                   | 42.35                                                           | -15.19 | -9.36 |
| <br>DR_GY2  | Yellow (opaque)<br>[NCS S 1050-G70Y]     |       |       | <br>DR_T3       | Blue (opaque)<br>[NCS S 2555-B20G]                              |        |       |
|                                                                                              | L*                                       | a*    | L*    |                                                                                                   | L*                                                              | a*     | b*    |
|                                                                                              | 61.35                                    | -7.28 | 37.16 |                                                                                                   | 50.26                                                           | -13.07 | -7.24 |
| <br>DR_LB1 | Blue/Green (opaque)<br>[NCS S 1515-B50G] |       |       | <br>DR_T4      | Blue (opaque)<br>[NCS S 3060-B10G]                              |        |       |
|                                                                                              | L*                                       | a*    | b*    |                                                                                                   | L*                                                              | a*     | b*    |
|                                                                                              | 57.55                                    | -7.07 | 0.92  |                                                                                                   |                                                                 |        |       |
| <br>DR_R1 | Red (opaque)<br>[NCS S 6030-Y90R]        |       |       | <br>DR_Am1_Au | Yellow (with golden leaf)<br>(translucent)<br>[NCS S 2060-G90Y] |        |       |
|                                                                                              | L*                                       | a*    | b*    |                                                                                                   | L*                                                              | a*     | b*    |
|                                                                                              | 34.33                                    | 23.81 | 14.45 |                                                                                                   |                                                                 |        |       |
| <br>DR_R2 | Red (opaque)<br>[NCS S 4550-Y80R]        |       |       | <br>DR_Am2_Au | Yellow (with golden leaf)<br>(translucent)<br>[NCS S 0530-Y20R] |        |       |
|                                                                                              | L*                                       | a*    | L*    |                                                                                                   | L*                                                              | a*     | b*    |
|                                                                                              | 34.42                                    | 23.85 | 15.24 |                                                                                                   |                                                                 |        |       |
| <br>DR_T1 | Blue (opaque)<br>[NCS S 2055-B10G]       |       |       | <br>DR_Am3_Au | Yellow (with golden leaf)<br>(translucent)<br>[NCS S 0515-G90Y] |        |       |
|                                                                                              | L*                                       | a*    | L*    |                                                                                                   | L*                                                              | a*     | b*    |
|                                                                                              | 47.3                                     | -11.8 | -8.79 |                                                                                                   |                                                                 |        |       |



| Tessera                                                                                         | Colour                                                          |    |    | Tessera | Colour |
|-------------------------------------------------------------------------------------------------|-----------------------------------------------------------------|----|----|---------|--------|
| 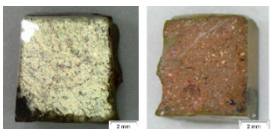<br>DR_Am4_Ag  | Yellow (with silver leaf)<br>(translucent)<br>[NCS S 0540-G90Y] |    |    |         |        |
|                                                                                                 | L*                                                              | a* | b* |         |        |
|                                                                                                 |                                                                 |    |    |         |        |
|                                                                                                 |                                                                 |    |    |         |        |
| <br>DR_Am5_Ag  | Yellow (with silver leaf)<br>(translucent)<br>[NCS S 0530-G90Y] |    |    |         |        |
|                                                                                                 | L*                                                              | a* | b* |         |        |
|                                                                                                 |                                                                 |    |    |         |        |
|                                                                                                 |                                                                 |    |    |         |        |
| <br>DR_Am6_Au  | Yellow (with golden leaf)<br>(translucent)<br>[NCS S 0570-G90Y] |    |    |         |        |
|                                                                                                 | L*                                                              | a* | b* |         |        |
|                                                                                                 |                                                                 |    |    |         |        |
|                                                                                                 |                                                                 |    |    |         |        |
| <br>DR_G1_Au  | Green (with golden leaf)<br>(translucent)<br>[NCS S 4550-G20Y]  |    |    |         |        |
|                                                                                                 | L*                                                              | a* | b* |         |        |
|                                                                                                 |                                                                 |    |    |         |        |
|                                                                                                 |                                                                 |    |    |         |        |
| <br>DR_Y1_Au | Yellow (with golden leaf)<br>(translucent)<br>[NCS S 4050-G90Y] |    |    |         |        |
|                                                                                                 | L*                                                              | a* | b* |         |        |
|                                                                                                 |                                                                 |    |    |         |        |
|                                                                                                 |                                                                 |    |    |         |        |

**Table S1:** Tesserae from the qasr of Khirbat al-Mafjar, the Great Mosque of Damascus and the Dome of the Rock selected for this study. Note: when, for opaque tesserae, L\*a\*b\* coordinates are missing, this is due to the irregular surface (or too small size) of the tesserae (and the unfeasibility of VIS-RS measurements).
